# Supplementary material for: Smad4 and TGFβ1 dependent gene expression signatures in conditional intestinal adenoma, organoids and colorectal cancer
Source: Springer Nature journal article supplement (doi:10.1038/s41598-025-00908-4), 2025-05-10

***Smad4* and TGF- $\beta$ 1 dependent gene expression signatures in conditional intestinal adenoma, organoids and colorectal cancer.**

Mirvat Surakhy<sup>1</sup>, Julia Matheson<sup>1</sup>, David Barnes<sup>1,3</sup>, Emma J. Carter<sup>1</sup>, Jennifer Hughes<sup>1</sup>, Claudia Bührenemann<sup>1</sup>, Sabina Sanegre<sup>1</sup>, Hans Morreau<sup>2</sup>, Paul Metz<sup>1</sup>, Charlotte J. Imianowski<sup>1</sup> and A. Bassim Hassan<sup>1,¶</sup>.

**Supplementary Information Western Blots**

**Figure 1d**  
**Western blot for anti-pSmad 1/5/8 and anti-pSmad3 and beta-actin**

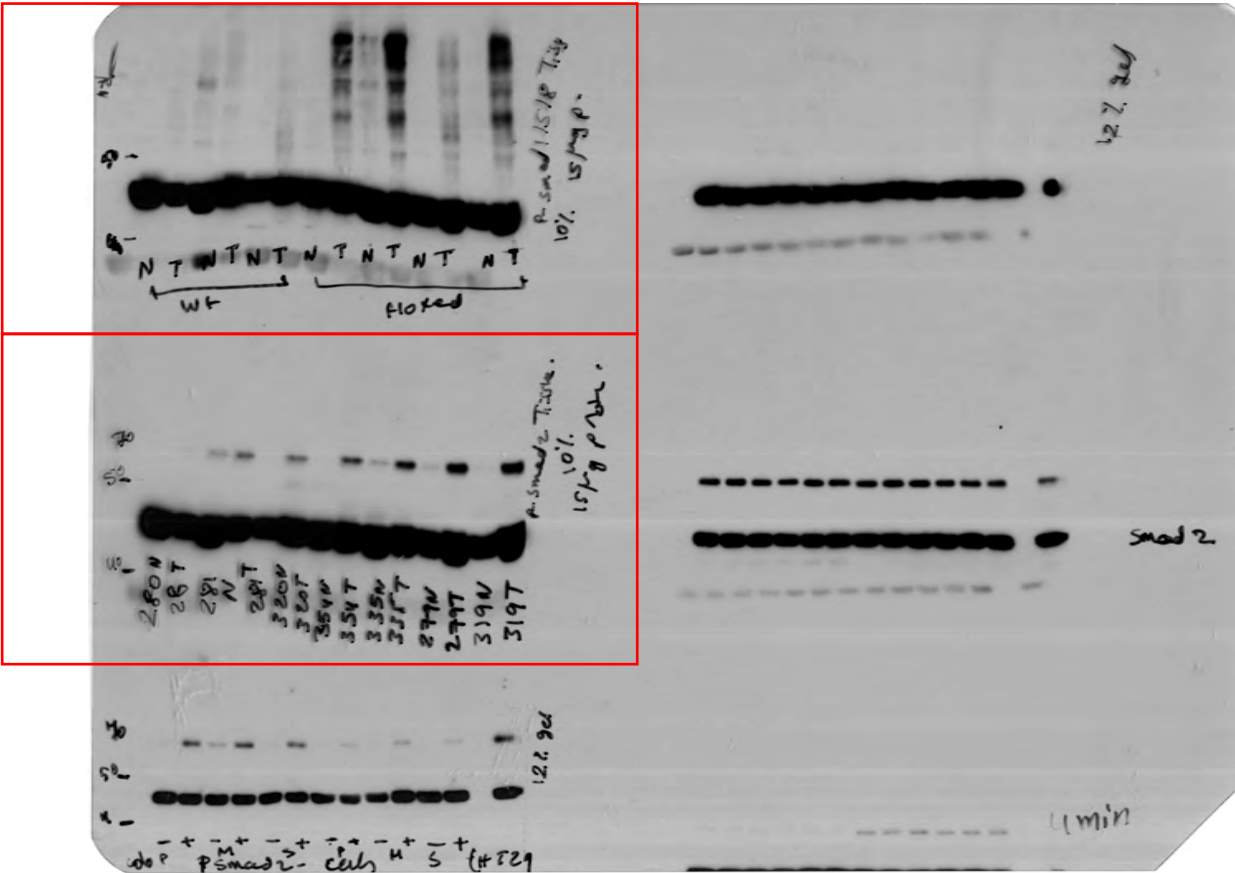

Western blot of adenoma (T) and normal tissue (N) from *Apc<sup>fl/fl</sup>Smad4<sup>+/+</sup>* and *Apc<sup>fl/fl</sup>Smad4<sup>f/fl</sup>* with anti-phospho-Smad2 (p-Smad2) and anti-phospho-Smad1/5/8 antibodies.

**Figure 2c: Western blots for anti-pSmad2, anti-Smad2 and beta actin**

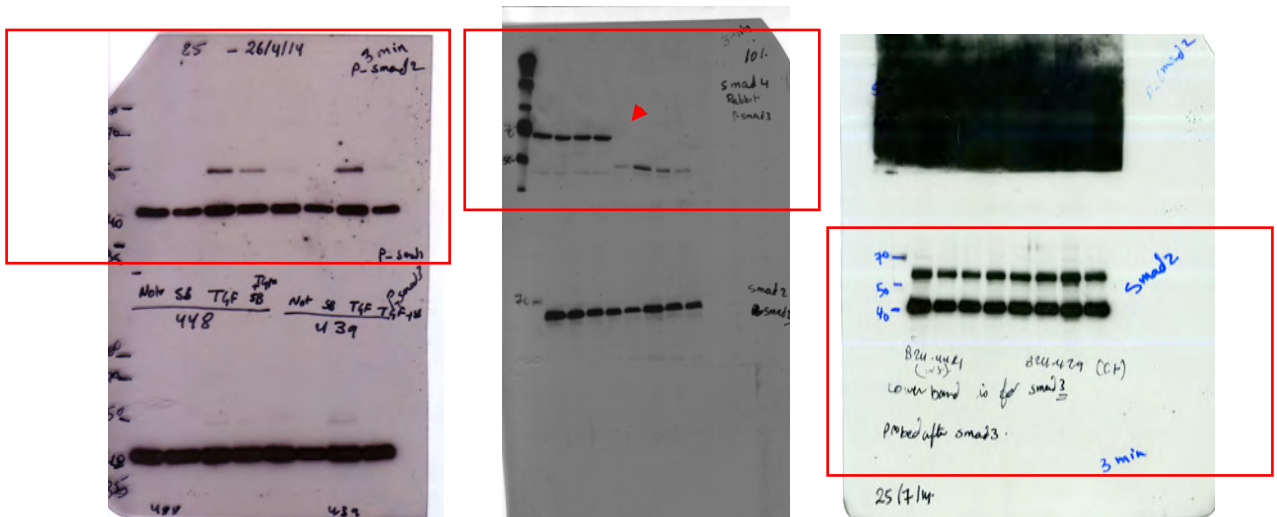

Western blots showing p-Smad2 (upper left), Smad4 (middle) and Smad2/ beta-actin (right). Lower left replicate for p-Smad3 in Fig 2c. The order of the samples from left to right as follow: Lane 1-4 is Smad4 *Apc $\Delta/\Delta$ Smad4 $^{+/+}$*  treated with vehicle, SB-505124, TGF- $\beta$ 1, and SB-505124, TGF- $\beta$ 1. And Lane 5-8 *Apc $\Delta/\Delta$ Smad4 $\Delta/\Delta$*  treated with vehicle, SB-505124, TGF- $\beta$ 1, and SB-505124, TGF- $\beta$ 1.

Three panels of gel electrophoresis images showing EMSA results for p-Smad3 and Smad3.

**Left Panel:** Shows p-Smad3 and Smad3 bands. The p-Smad3 band is labeled "p-Smad3" and the Smad3 band is labeled "Smad3".

**Middle Panel:** Shows p-Smad3 and Smad3 bands. The p-Smad3 band is labeled "p-Smad3" and the Smad3 band is labeled "Smad3". The treatments are: not, SB, TGF $\beta$ , TGF $\beta$  + SB, and TGF $\beta$  + 5 $\mu$ . The gel is labeled "gel 10%".

**Right Panel:** Shows p-Smad3 and Smad3 bands. The p-Smad3 band is labeled "p-Smad3" and the Smad3 band is labeled "Smad3". The treatments are: not, SB, TGF $\beta$ , TGF $\beta$  + SB, and TGF $\beta$  + 5 $\mu$ . The gel is labeled "gel 10%". A note at the bottom says "Reprobed with 1 $^{\circ}$ A over night (Amersham kit was used 0.5 $\mu$ l)".

Western blots showing p-Smad3 (upper band) and Smad3 (Lower panel). The order of the samples from left to right as follow: Lane 1-4 is Smad4 *Apc*<sup>Δ/Δ</sup>*Smad4*<sup>+/+</sup> treated with vehicle, SB-505124, TGF-β1, and SB-505124, TGF-β1. And Lane 5-8 *Apc*<sup>Δ/Δ</sup>*Smad4*<sup>Δ/Δ</sup> treated with vehicle, SB-505124, TGF-β1, and SB-505124, TGF-β1. Middle and right panel replicates, with blot in Fig2c panel an additional replicate.

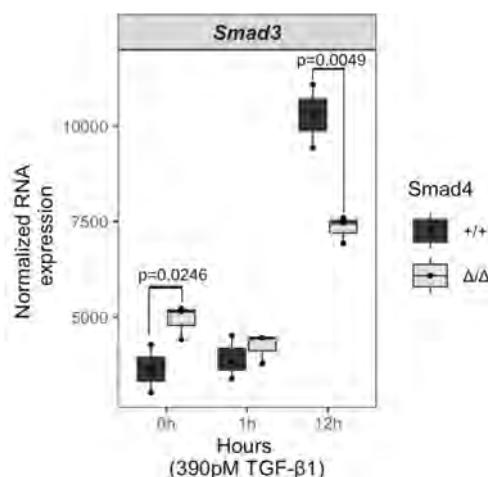

Effects of TGF- $\beta$ 1 exposure on Smad3 mRNA expression (as in Figure 3h).

**Figure 2d**  
**Western blot for anti-pSmad2 and beta-actin**

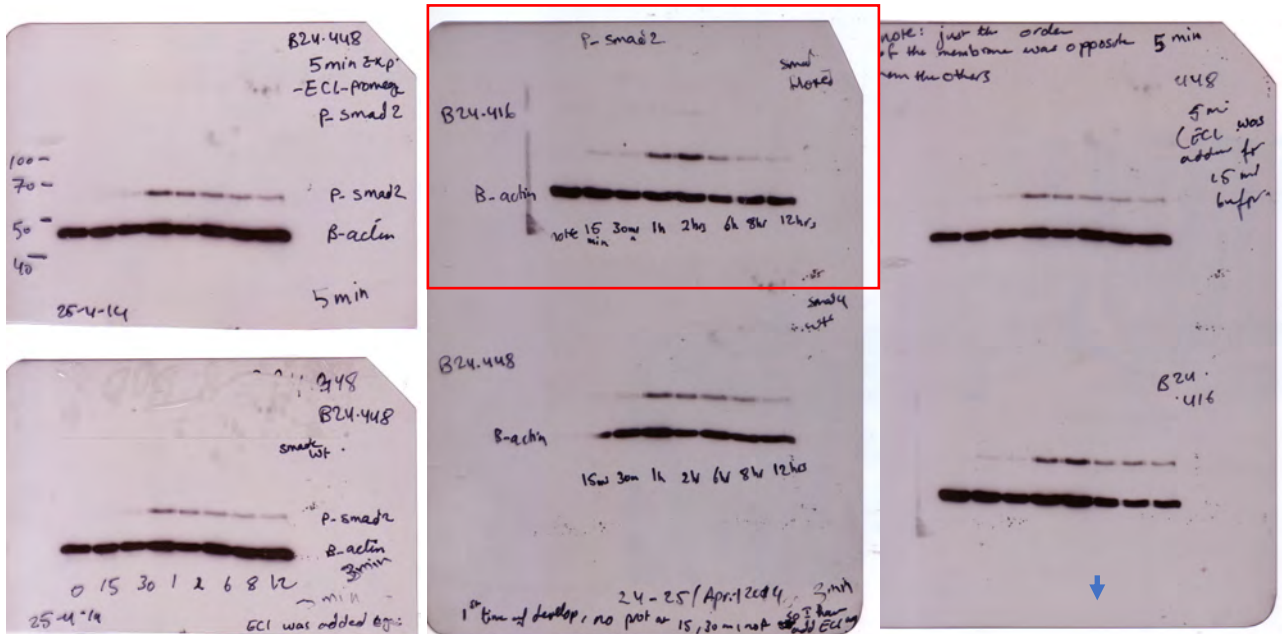

Associated western immunoblots of p-Smad2 at different time points (h, annotated) following TGF- $\beta$ 1 (390pM), densitometry relative to  $\beta$ -actin.

**Figure 2g**  
**Western blot for anti-Cleaved Caspase 3 (CC3)**

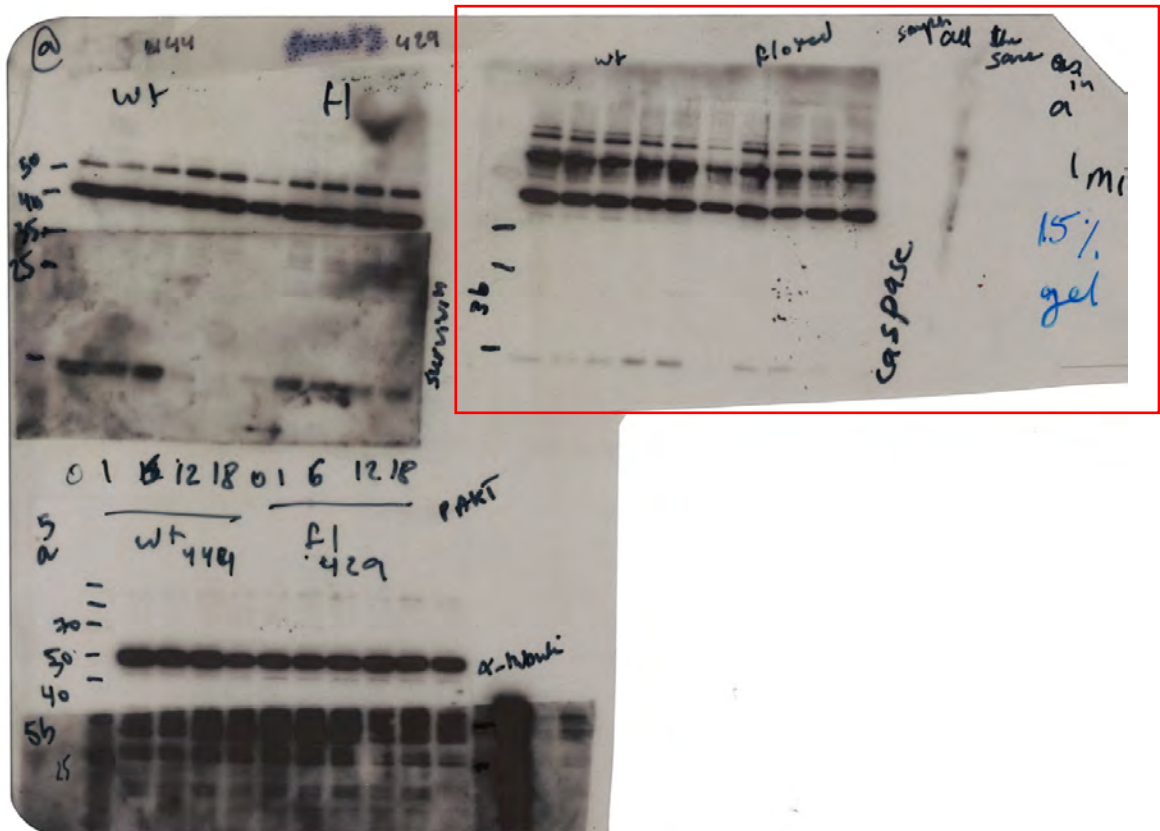

Associated western immunoblots of CC3 at different time points (h, annotated) following TGF- $\beta$ 1 (390pM), densitometry relative to  $\beta$ -actin.

## Supplementary Figure 2c

### Western blot for anti-Smad4 and anti-tubulin

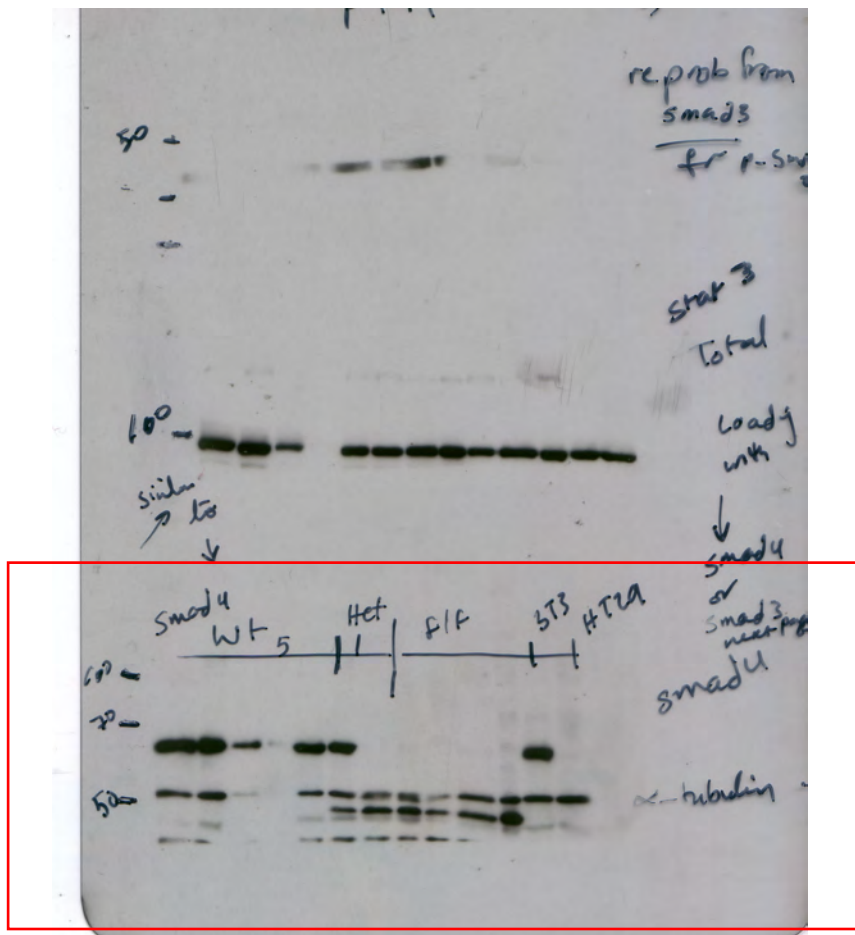

Western blots (left panel) showing Smad4 protein of 61kDa from *Apc<sup>Δ/Δ</sup>Smad4<sup>+/+</sup>* and *Apc<sup>Δ/Δ</sup>Smad4<sup>Δ/+</sup>* adenomas, and a truncated Smad4 protein of 43 kDa in *Apc<sup>Δ/Δ</sup>Smad4<sup>Δ/+</sup>* and *Apc<sup>Δ/Δ</sup>Smad4<sup>Δ/Δ</sup>*. Controls: 3T3 fibroblast cells with intact *Smad4* (positive control). HT29 CRC cells have *Smad4* mutation (C931 C>T) in the MH2 domain (negative control).



**Supplementary Figure 7b**  
**Western blot for anti-Id1 and anti-beta-actin**

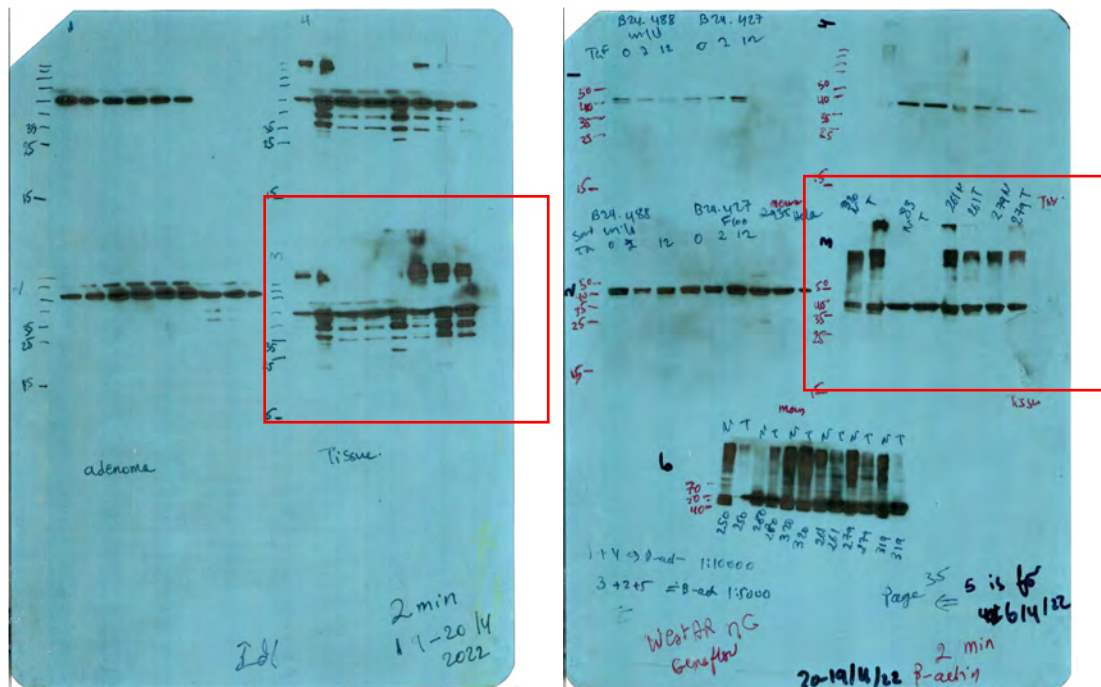

**7b** Western blot of Id1 (50kDa) from adenoma (T) and adjacent normal tissue (N) from *Apc<sup>fl/fl</sup>Smad4<sup>+/+</sup>* and *Apc<sup>fl/fl</sup>Smad4<sup>fl/fl</sup>*.  $\beta$ -actin (43kDa) is a loading control.



### Western blot for anti-Id1 and anti-beta-actin

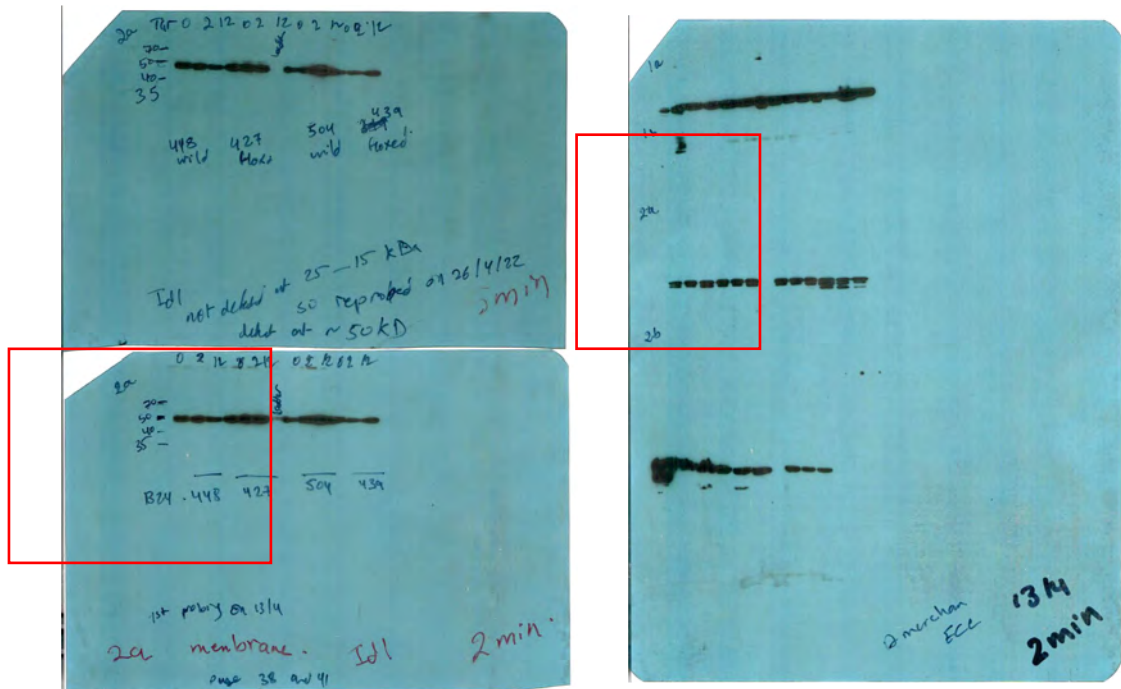

**7c** Western blot of Id1 from in *Smad4*<sup>Δ/Δ</sup> and *Smad4*<sup>+/+</sup> adenoma organoids at t=0, t=2 and t=12hr of 390pM TGF-β1 treatment.

## Supplementary Figure 8

Western blots for anti-fibronectin, anti-N-cadherin, anti-Smad4, anti-c-Myc and anti-beta-actin

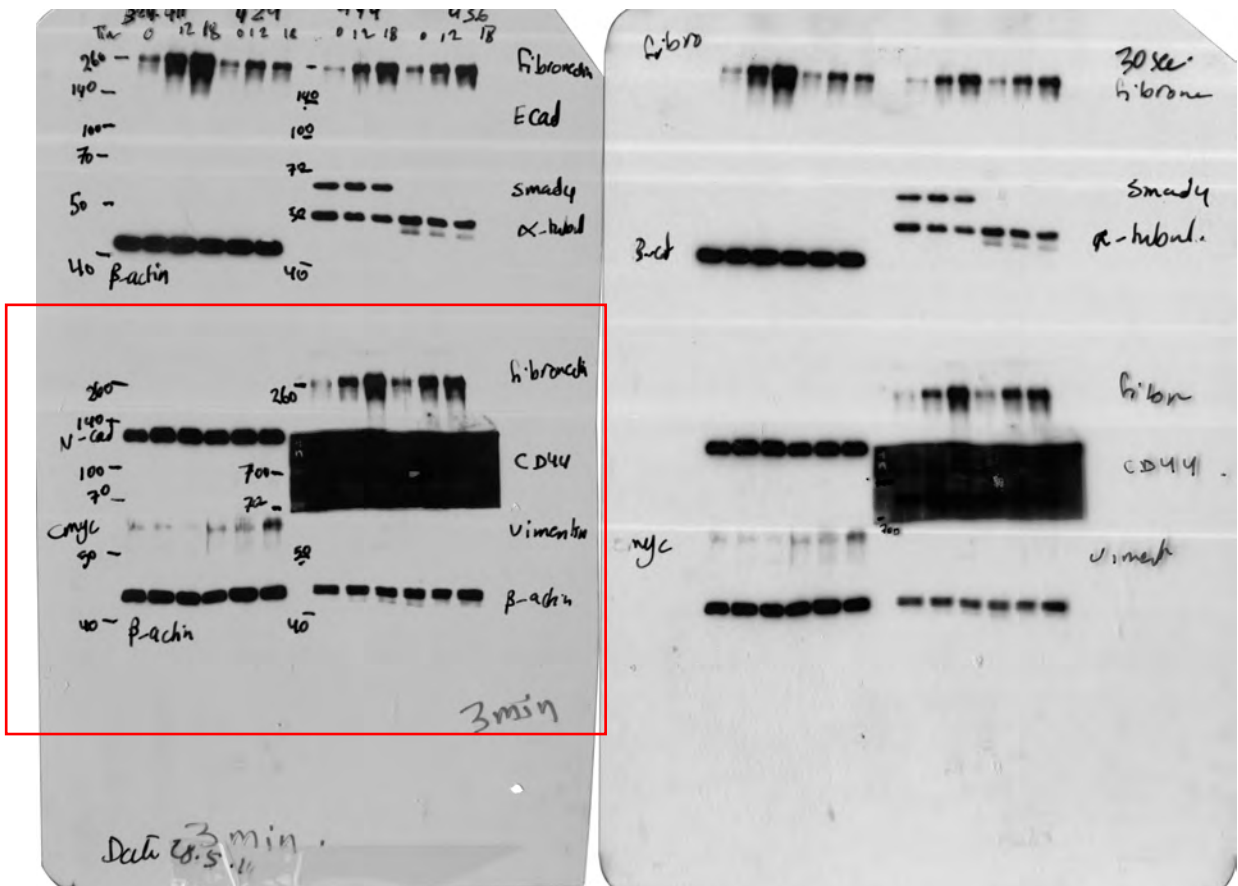

Western blot used for Suppl Figure 8 for fibronectin, N-cadherin with  $\beta$ -actin, also included C-myc and Smad4.

## Supplementary Figure 9

### Western blots for anti-survivin and anti-beta-actin

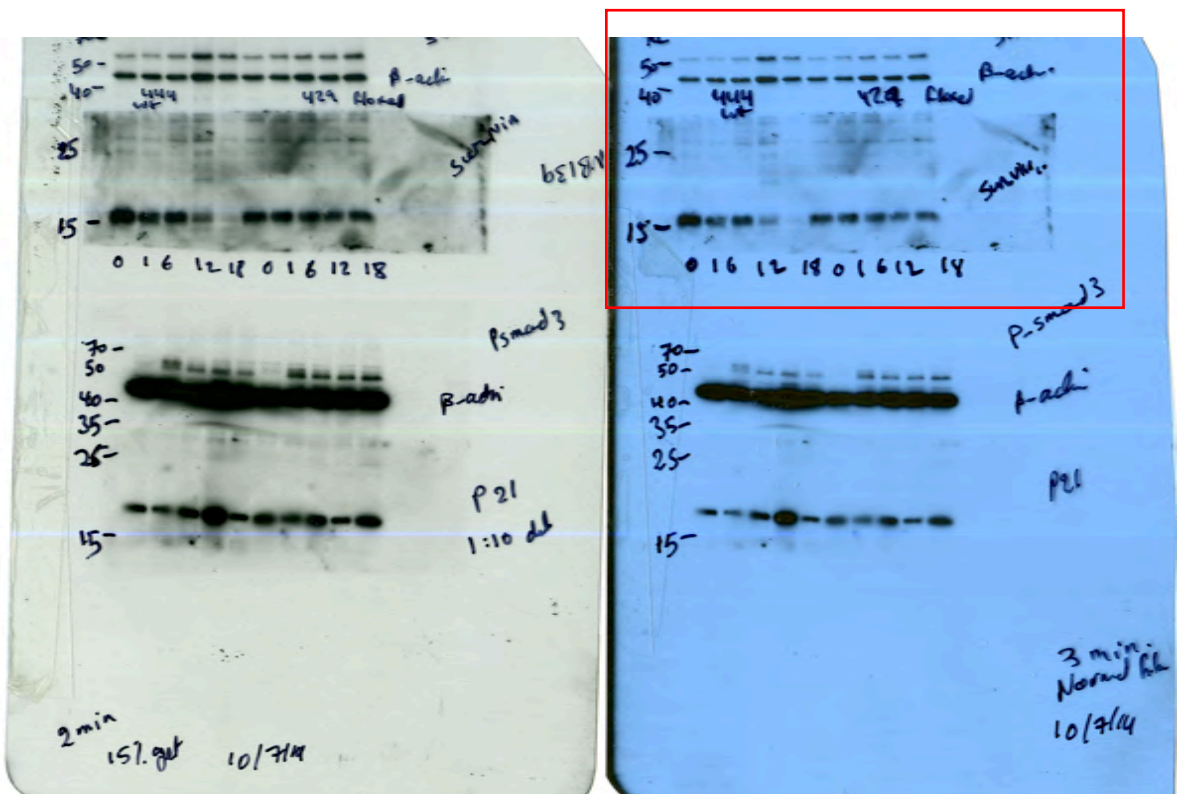

Western immunoblots showing the downregulation of Survivin within 12h TGF- $\beta$ 1 treatment predominantly in Smad4<sup>+/+</sup> adenomas.

Representative western blots showing for  $\beta$ -catenin, E-cadherin and c-Myc at different time points following TGF- $\beta$ 1 exposure.  $\beta$ -catenin at 92 kDa (arrow) with multiple bands suggesting degradation. E-cadherin at 130 kDa with multiple bands suggesting degradation. c-Myc at 67 kDa.

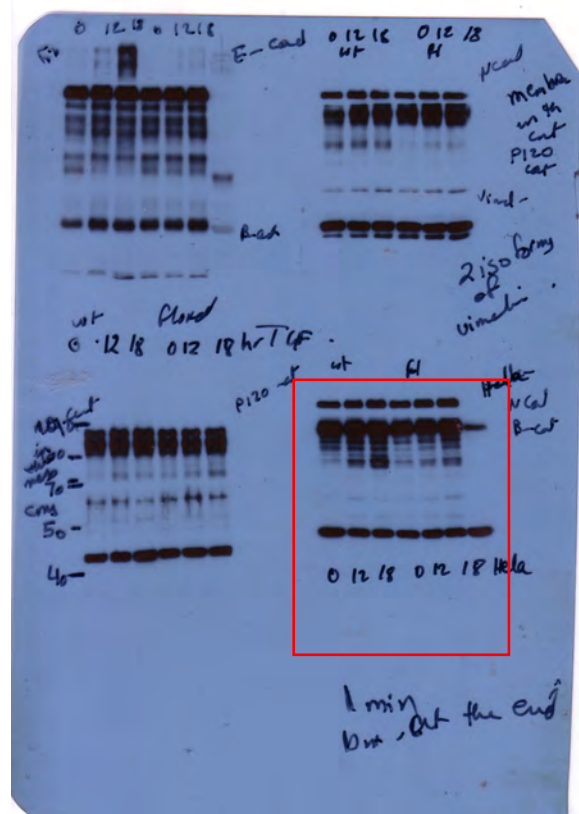

Supplement: MOESM10 [file 41598_2025_908_MOESM10_ESM.pdf]
